# Supplementary material
Source: PubMed Central journal article supplement (PMC4778397)
Supplement: NIHMS760517-supplement-01.pdf [file NIHMS760517-supplement-01.pdf]

**TABLE S1: Chart Review of Imaging Examinations Performed Before or in the Absence of Prostate-Specific Antigen (PSA) Level Elevations**

| Reason for Imaging                                                                     | No. of Patients ( <i>n</i> = 85) | No. of Examinations ( <i>n</i> = 164) |
|----------------------------------------------------------------------------------------|----------------------------------|---------------------------------------|
| Clinical suspicion of recurrence                                                       | 34                               | 50                                    |
| Bone pain                                                                              | 29                               | 40                                    |
| Biochemical recurrence or abnormal digital rectal examination                          | 5                                | 10                                    |
| Mislabeled indication                                                                  | 10                               | 16                                    |
| Related to another cancer                                                              | 7                                | 23                                    |
| Treatment-related examinations                                                         | 20                               | 35                                    |
| Restaging before another treatment type                                                | 10                               | 20                                    |
| Checking for radiotherapy seed migration                                               | 8                                | 13                                    |
| Repeat biopsy                                                                          | 1                                | 1                                     |
| Check for enlarged lymph nodes and kidneys after starting androgen deprivation therapy | 1                                | 1                                     |
| Clarification of previous examinations                                                 | 4                                | 4                                     |
| Whole-body bone scan suspicious for metastasis                                         | 2                                | 2                                     |
| Whole-body bone scan negative, but checking lymph nodes anyway                         | 1                                | 1                                     |
| Previous CT indicated metastasis                                                       | 1                                | 1                                     |
| Posttreatment because of scheduling issues                                             | 1                                | 1                                     |
| Other reasons                                                                          | 9                                | 19                                    |
| High tumor grade prostate cancer at diagnosis                                          | 2                                | 11                                    |
| Testicular mass                                                                        | 1                                | 2                                     |
| Positive Babinski sign                                                                 | 1                                | 1                                     |
| Disoriented                                                                            | 1                                | 1                                     |
| Voiding issues                                                                         | 1                                | 1                                     |
| Hematuria                                                                              | 2                                | 2                                     |
| Abdominal fullness                                                                     | 1                                | 1                                     |
| No reason given                                                                        | 13                               | 17                                    |

Note—Numbers in columns do not match totals because more than one reason could be given for each patient or examination.

**TABLE S2: Types of Examinations Performed on Patients With Potential Cancer Recurrence**

| Imaging Modality, Anatomic Location | All Patients | Prostate Cancer Only | Other Cancer |
|-------------------------------------|--------------|----------------------|--------------|
| No. of patients                     | 90           | 64                   | 26           |
| No. of examinations                 | 241          | 160                  | 81           |
| Whole-body bone scan                | 76           | 51                   | 25           |
| Bone imaging SPECT                  | 12           | 9                    | 3            |
| CT                                  |              |                      |              |
| Pelvis                              | 3            | 3                    | 0            |
| Abdomen and pelvis                  | 40           | 30                   | 10           |
| Spine                               | 1            | 0                    | 1            |
| Chest                               | 7            | 5                    | 2            |
| Urogram                             | 3            | 1                    | 2            |
| MRI                                 |              |                      |              |
| Abdomen                             | 1            | 0                    | 1            |
| Abdomen and pelvis                  | 1            | 1                    | 0            |
| Pelvis (endorectal)                 | 32           | 30                   | 2            |
| Pelvis                              | 4            | 1                    | 3            |
| Spine                               | 5            | 2                    | 3            |
| X-ray                               |              |                      |              |
| Pelvis                              | 6            | 2                    | 4            |
| Spine                               | 17           | 6                    | 11           |
| Chest                               | 14           | 5                    | 9            |
| Ultrasound                          |              |                      |              |
| Transrectal                         | 12           | 8                    | 4            |
| Pelvis                              | 1            | 0                    | 1            |
| ProstaScint (Cytogen)               | 3            | 3                    | 0            |
| PET                                 | 3            | 3                    | 0            |
